# Supplementary material for: Exploration of high-performance light-conversion agents based on cyanostilbene and phenanthrenecarbonitrile backbones: E/Z and position isomerism, high-contrast Michael addition reaction activity and intramolecular photocyclization
Source: Royal Society of Chemistry journal article supplement (doi:10.1039/d1tc02405a), 2021-01-01
Supplement: d1tc02405a1.pdf [file d1tc02405a1.pdf]

1 **Supporting information: Exploration of high-performance light**  
2 **conversion agent based on cyanostilbene and phenanthrenecarbonitrile**  
3 **backbone: E/Z and position isomerism, high-contrast Michael addition**  
4 **reaction activity and intramolecular photocyclization**

5 Yongtao Wang, <sup>a</sup>Zhean Qian, <sup>a</sup>Xueming Li, <sup>a</sup>Anjun Qin, <sup>b</sup>Yanjuan Guo<sup>a</sup> and Benzhong Tang<sup>b</sup>

6 <sup>a</sup> Guangxi Key Laboratory of Electrochemical and Magneto-chemical Function Material, College of Chemistry and  
7 Bioengineering, Guilin University of Technology, Guilin 541004, China.

8 <sup>b</sup>School of Materials Science and Engineering, South China University of Technology, Guangzhou, 510641, PR China

9 E-mail: wyt\_shzu@163.com; msqinaj@scut.edu.cn; tangbenz@ust.hk.

10 Keywords: Light conversion agent; AIE; Photochemistry; E/Z isomers; Cyanostilbene derivatives.

## 11 **1. Experimental**

12 **1.1. Measurement and characterization.** <sup>1</sup>H NMR spectra and <sup>13</sup>C NMR spectra were obtained with a Varian  
13 inova instrument at 500 MHz and 100 MHz using tetramethylsilane (TMS) as the internal standard, and CDCl<sub>3</sub> or  
14 DMSO as the solvent in all cases. The melting points of the purified samples were tested on LSD128. UV-vis  
15 absorption spectra were obtained on a MaPada UV-3200PCS spectrophotometer. The absolute fluorescence  
16 quantum yields were determined by a calibrated integrating sphere on Perkin-Elmer LS-55. Fluorescent emission  
17 spectra were obtained on a Hitachi F-2500 fluorescence spectrophotometer. MALDI/HRMS was recorded on an  
18 UltrafleXtreme MALDI-TOF/TOF mass spectrometer (Bruker, Germany). Powder X-ray diffraction (XRD) was  
19 performed on a Bruker D8 Focus Powder X-ray diffraction instrument. Single-crystal X-ray diffraction data were  
20 collected by Oxford Diffraction Xcalibur Eos diffractometer equipped with an Eos detector and operating graphite  
21 monochromated MoK $\alpha$  radiation ( $\lambda = 0.71073\text{\AA}$ ).

22 **1.2. Materials and Synthesis.** THF was dried according to standardized procedures previously described. All  
23 the other chemicals and reagents used in this study were of analytical grade without further purification. In general,  
24  
25 all the intermediates and final compounds were purified by column chromatography on silica gel (200–300 mesh),  
26  
27 and crystallization from analytical grade solvents. Reactions were monitored using thin layer chromatography

28 (TLC).

29

30 **1.2.1. Preparation of (Z)-2-(2(9H-carbazol-9-yl) phenyl)-2-phenylacrylonitrile (Z-oCz).**

31 Carbazole (0.5g, 2.98mmol), 2-fluorobenzaldehyde (0.37g, 2.98mmol), potassium carbonate (0.62g, 4.5mmol),  
32 copper iodide (0.066g, 0.35mmol) and 18-crown-6 (0.055g, 0.22mmol) were dissolved into DMF (3-5ml). Then  
33 the solution was heated and refluxed for 12h. Next, the mixture was poured into water and extracted with  
34 dichloromethane (20×3 mL). Then the organic phase was combined and dried over anhydrous Na<sub>2</sub>SO<sub>4</sub>. Removing  
35 the solvent under reduced pressure and a yellow residue solid was collected. Then, the solid was dried under  
36 vacuum followed by dissolving in C<sub>2</sub>H<sub>5</sub>OH (5ml). Subsequently, phenylacetonitrile (0.35 mL, 3mmol) and aqueous  
37 40% NaOH were added to the above solution, then stirred overnight at room temperature. The crude product was  
38 directly filtered and washed three times, then purified by chromatography (silica gel, CH<sub>2</sub>Cl<sub>2</sub>/petroleum ether, v/v  
39 = 1:10). A white solid was obtained. Yield: 92%; mp 132.1-133.3 °C. <sup>1</sup>H NMR (500 MHz, CDCl<sub>3</sub>) δ/ppm= 8.53-8.51  
40 (m, 1H), 8.20 (d, J=5.0, 2H), 7.74-7.68 (m, 2H), 7.60-7.55 (m, 1H), 7.44-7.40 (m, 2H), 7.35-7.31(m, 2H), 7.26-7.15 (m,  
41 5H), 7.11-7.07 (m, 2H), 6.97(s,1H) (Fig. S3); <sup>13</sup>C NMR (100 MHz, CDCl<sub>3</sub>) δ/ppm= 141.50, 137.89, 137.24, 133.93,  
42 132.57, 131.65, 139.26, 128.98, 128.84, 126.33, 126.05, 123.44, 120.45, 120.37, 117.66, 114.20, 110.06 (Fig. S4);  
43 HRMS (MALDI-TOF): m/z 371.1539 [[M +H] <sup>+</sup>, calculated 371. 1548] (Fig. S5).

44 **1.2.2. Synthesis of (E)-2-(2(9H-carbazol-9-yl) phenyl)-2-phenylacrylonitrile (E-oCz).**

45 1 mM solution of starting material (Z-oCz) in THF (10 mL) in a 50 mL screw bottle was irradiated for 3h at a distance  
46 of 10 cm from a 150 W high-pressure mercury lamp in the presence of I<sub>2</sub>. After filtration of reaction mixture, the  
47 solvent was evaporated under reduced pressure. The crude product was purified by chromatography (silica gel,  
48 CH<sub>2</sub>Cl<sub>2</sub>/petroleum ether, v/v = 1:10). A white solid was obtained. Yield: 42%; mp 265.0–266.0 °C. <sup>1</sup>H NMR (500 MHz,  
49 CDCl<sub>3</sub>) δ/ppm= 8.21 (d, J=10.0, 2H), 7.57-7.53 (m, 1H), 7.49-7.31 (m, 12H), 7.13 (d, J=5.0, 2H), 6.85(s,1H) (Fig. S6);  
50 <sup>13</sup>C NMR (100 MHz, CDCl<sub>3</sub>) δ/ppm= 141.24, 139.34, 137.27, 129.73, 129.55, 129.10, 128.65, 128.14, 126.26, 123.58,  
51 120.64, 120.40, 119.47, 116.16, 109.56, 117.66, 114.20, 110.06 (Fig. S7); HRMS (MALDI-TOF): m/z 371.1547 [[M  
52 +H] <sup>+</sup>, calculated 371. 1548] (Fig. S8).

53 **1.2.3. 3-(2-(9H-carbazol-9-yl) phenyl)-2,4-diphenylpentanedinitrile (DCN).**

54 Compound DCN was prepared by following the synthetic procedure for compound Z-oCz, but the difference is that  
55 the amount of phenylacetonitrile added is 0. 53 mL (4.5mmol). The crude product was purified by column  
56 chromatography (silica gel, CH<sub>2</sub>Cl<sub>2</sub>–petroleum ether, v/v = 1:10). A white solid was obtained. Yield: 75%. mp 161-  
57 162 °C. <sup>1</sup>H NMR (500 MHz, DMSO) δ/ppm= 8.35-8.21 (m, 3H), 7.88 (t, J=7.5, 1H), 7.72 (t, J=7.5, 1H), 7.44 (d, J=10.0,  
58 1H), 7.36-7.28(m, 4H), 7.09(d, J=10.0, 2H), 6.98 (t, J=7.5, 2H), 6.88 (t, J=7.5, 4H), 6.52(d, J=5.0, 4H), 4.68(d, J=5.0,

59 2H), 3.60(t,  $J=10.0$ , 1H) (Fig. S9);  $^{13}\text{C}$  NMR (100 MHz, DMSO)  $\delta/\text{ppm}= 141.33, 137.34, 130.34, 129.12, 126.27,$   
60 123.18, 119.88, 118.79, 110.37, 47.17, 41.35 (Fig. S10); HRMS (MALDI-TOF):  $m/z$  487. 2053  $[[\text{M}]^+]$ , calculated 487.  
61 2048] (Fig. S11).

62 **1.2.4. (Z)-3-(4-(9H-carbazol-9-yl) phenyl)-2-phenylacrylonitrile (Z-pCa).**

63 Compound **Z-pCa** was prepared by following the synthetic procedure for compound **Z-oCz**. The crude product  
64 was  
65 purified by column chromatography (silica gel,  $\text{CH}_2\text{Cl}_2$ -petroleum ether,  $v/v = 1:10$ ). A white solid was obtained.  
66 Yield: 95%. mp 170-171.5 °C.  $^1\text{H}$  NMR (500 MHz, DMSO)  $\delta/\text{ppm}= 8.28$  (t,  $J=7.5$ , 4H), 8.21 (s, 1H), 7.85 (t,  $J=7.5$ ,  
67 4H),  
68 7.59-7.48 (m, 7H), 7.34(t,  $J=7.5$ , 4H), 7.09(d,  $J=10.0$ , 2H), 6.98 (t,  $J=7.5$ , 2H), 6.88 (t,  $J=7.5$ , 4H), 6.52(d,  $J=5.0$ , 4H),  
69 4.68(d,  $J=5.0$ , 2H), 3.60(t,  $J=10.0$ , 1H) (Fig. S12);  $^{13}\text{C}$  NMR (100 MHz, DMSO)  $\delta/\text{ppm}= 142.38, 140.18, 139.12,$   
70 129.74, 126.92, 126.38, 123.53, 121.09, 120.98, 118.42, 110.96, 110.32 (Fig. S13); HRMS (MALDI-TOF):  $m/z$   
71 371.1547  $[[\text{M} + \text{H}]^+]$ , calculated 371. 1548] (Fig. S14).

72 **1.2.5.3-(9H-carbazol-9-yl) phenanthrene-9-carbonitrile (C-Ca).**

73 Compound **C-Ca** was prepared by following the synthetic procedure for compound **E-oCz**. The crude product was  
74  
75 purified by column chromatography (silica gel,  $\text{CH}_2\text{Cl}_2$ -petroleum ether,  $v/v = 1:10$ ). A white solid was obtained.  
76 Yield: 6%. mp 265.0-266.0 °C.  $^1\text{H}$  NMR (500 MHz, DMSO)  $\delta/\text{ppm}= 8.94$  (s, 1H), 8.68 (d,  $J=5.0$ , 1H), 8.42-8.40 (m,  
77 2H), 8.24-8.22 (m, 3H), 7.96(dd,  $J_1=2.5, J_2=2.5$ , 1H), 7.85-7.79(m, 2H), 7.57 (d,  $J=5.0$ , 2H), 7.48 (t,  $J=7.5$ , 2H), 7.39(t,  
78  
79  $J=7.5$ , 2H) (Fig. S15);  $^{13}\text{C}$  NMR (100 MHz, DMSO)  $\delta/\text{ppm}= 140.71, 139.19, 131.35, 129.23, 128.60, 126.36, 123.84,$   
80  
81 120.82, 120.60, 109.91, 109.59 (Fig. S16); HRMS (MALDI-TOF):  $m/z$  369.1392  $[[\text{M} + \text{H}]^+]$ , calculated 369. 1392] (Fig.  
82 S17).

83 Preparation of light conversion films and blank films. In an oven-dried flask equipped with a mechanical stirrer,  
84 polyvinyl chloride/(PABT) (4.95 g) and light conversion agent (0.05 g) were dissolved into 30 mL THF/ $(\text{CH}_2\text{Cl}_2)$ .  
85 The mixture was stirred for 12 h at room temperature. After that, the flask was placed into an ultrasonic  
86 oscillator for 30 min to remove the bubbles in the mixture. Then the mixture was poured onto a prepared glass  
87 plate/(adhesive tape) and paved rapidly with a glass rod. Finally, the film was put into a ventilated cabinet until  
88 the THF/ $(\text{CH}_2\text{Cl}_2)$  was volatilized completely, and light conversion films of 1% (mass fraction) were obtained. The  
89 blank films are prepared by following the procedure for light conversion films, but without the addition of light  
90 conversion agent.

91 **Table S1** Absorption and emission maxima of **Z-oCa**, **E-oCa**, **Z-pCa** and **C-Ca** in various  
92 solvents.

|                                 | <b>Z-oCa</b>           |                                 | <b>E-oCa</b>           |                                 | <b>Z-PCa</b>           |                                 | <b>C-Ca</b>            |                                 |
|---------------------------------|------------------------|---------------------------------|------------------------|---------------------------------|------------------------|---------------------------------|------------------------|---------------------------------|
|                                 | $\lambda_{\text{abs}}$ | $\lambda_{\text{em}} (\Phi \%)$ |
| n-Hexane                        | 314                    | 422 (0.19)                      | 316                    | 423 (0.85)                      | 364                    | 400 (0.23)                      | 362                    | 395 (0.98)                      |
| Toluene                         | 315                    | 466 (8.60)                      | 318                    | 467 (14.53)                     | 366                    | 433 (6.92)                      | 364                    | 405 (20.66)                     |
| CH <sub>2</sub> Cl <sub>2</sub> | 316                    | 506 (14.75)                     | 319                    | 504 (4.44)                      | 359                    | 454 (14.50)                     | 356                    | 451 (19.96)                     |
| THF                             | 316                    | 494 (19.57)                     | 320                    | 506 (17.50)                     | 355                    | 482 (15.61)                     | 353                    | 438 (18.62)                     |
| DMSO                            | 314                    | 536 (1.92)                      | 321                    | 538 (8.54)                      | 361                    | 517 (5.90)                      | 353                    | 462 (7.70)                      |

93  $\lambda_{\text{abs}}$  represents absorption maxima,  $\lambda_{\text{em}}$  represents emission maxima,  $\Phi$  represents fluorescence quantum yield.

94 **Table S2** Emission maxima of **Z-oCa**, **E-oCa**, **Z-pCa** and **C-Ca** in different solid-states and  
95 PVC doped films.

|                      | <b>Z-oCa</b> | <b>E-oCa</b> | <b>Z-pCa</b> | <b>C-Ca</b> |
|----------------------|--------------|--------------|--------------|-------------|
| $\lambda_{\text{c}}$ | 456          | 450          | 475          | 433         |
| $\lambda_{\text{g}}$ | 448          | 446          | 469          |             |
| $\lambda_{\text{f}}$ | 452          | 451          | 467          |             |
| $\lambda_{\text{h}}$ | 455          | 445          | 461          |             |
| $\lambda_{\text{m}}$ | 454          | 455          | 457          | 449         |
| $\Delta\lambda_1$    | -8           | -4           | -6           |             |
| $\Delta\lambda_2$    | -4           | -1           | -8           |             |
| $\Delta\lambda_3$    | -1           | -5           | -14          |             |
| $\Delta\lambda_4$    | -2           | 5            | -18          |             |

96  $\lambda$  represents emission maxima; c, g, f, h and m represent crystal, ground, fuming, annealed and film in turn.

97  $\Delta\lambda_1 = \lambda_{\text{c}} - \lambda_{\text{g}}$ ;  $\Delta\lambda_2 = \lambda_{\text{c}} - \lambda_{\text{f}}$ ;  $\Delta\lambda_3 = \lambda_{\text{c}} - \lambda_{\text{h}}$ ;  $\Delta\lambda_4 = \lambda_{\text{c}} - \lambda_{\text{m}}$ .

98

99

100 **Table S3** The photosynthetic photon flux density (PPFD) of the blank and C-Ca film in  
101 different wavelength bands

102

| Wavelength band | Blank film<br>PPFD<br>( $\mu\text{mol}/(\text{m}^2.\text{s})$ ) | C-Ca film<br>PPFD<br>( $\mu\text{mol}/(\text{m}^2.\text{s})$ ) |
|-----------------|-----------------------------------------------------------------|----------------------------------------------------------------|
| (380~400nm)     | 31.70                                                           | 18.52                                                          |
| (400~500nm)     | 424.42                                                          | 637.20                                                         |
| (500~600nm)     | 588.90                                                          | 796.00                                                         |
| (600~700nm)     | 637.76                                                          | 858.00                                                         |
| (700~780nm)     | 457.08                                                          | 615.73                                                         |

103

104 **Table S4 Percentages of different wavelength bands among the whole waveband for**  
 105 **the bank and C-Ca film.**

106

| Wavelength band | Blank film<br>Percentage | C-Ca film<br>Percentage |
|-----------------|--------------------------|-------------------------|
| (380~400nm)     | 2.19%                    | 0.93%                   |
| (400~500nm)     | 25.31%                   | 27.76%                  |
| (500~600nm)     | 29.05%                   | 28.60%                  |
| (600~700nm)     | 26.67%                   | 26.07%                  |
| (700~780nm)     | 16.78%                   | 16.46%                  |

107

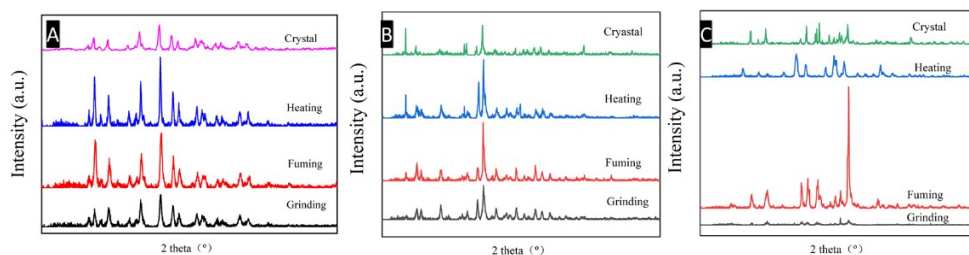

108

Fig S1 XRD spectra of **Z-oCa**, **E-oCa** and **Z-pCa** in different solid states.

109

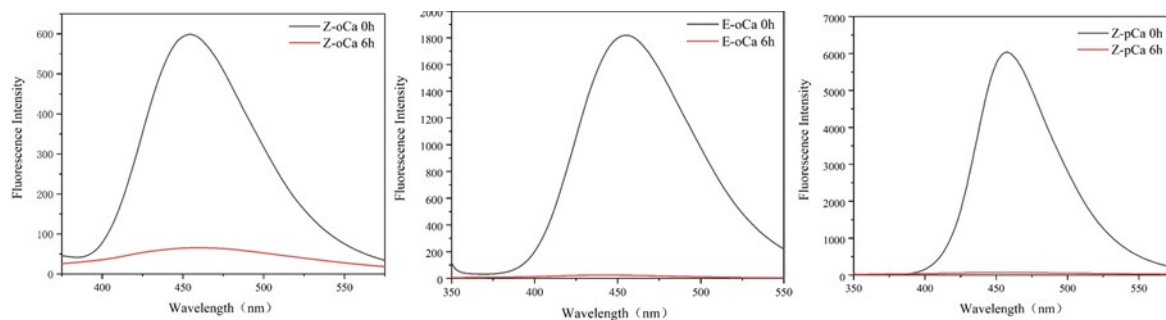

110

111 **Fig S2** The fluorescence spectra of **Z-oCa**, **E-oCa** and **Z-pCa** in PVC films by 150 W  
 112 high-pressure mercury lamp emitting a near-UV radiation of 365 nm wavelength for  
 113 6h.

114

115

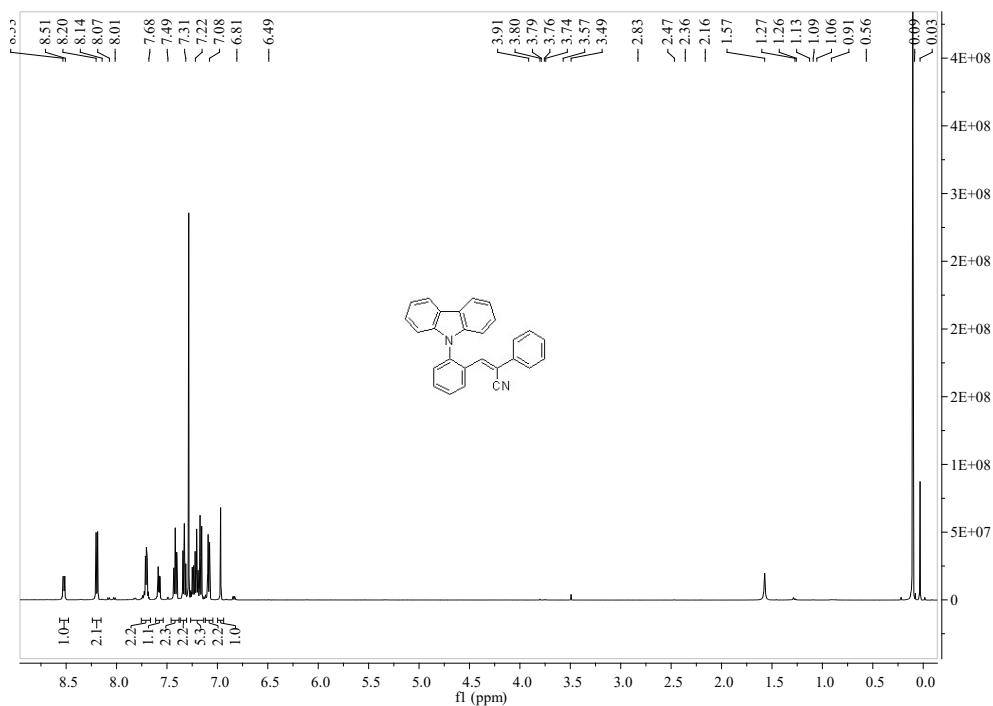

116

117 **Fig S3.**  $^1\text{H}$  NMR (500 MHz) spectrum of **Z-oCa** in  $\text{CDCl}_3$ .

118

119

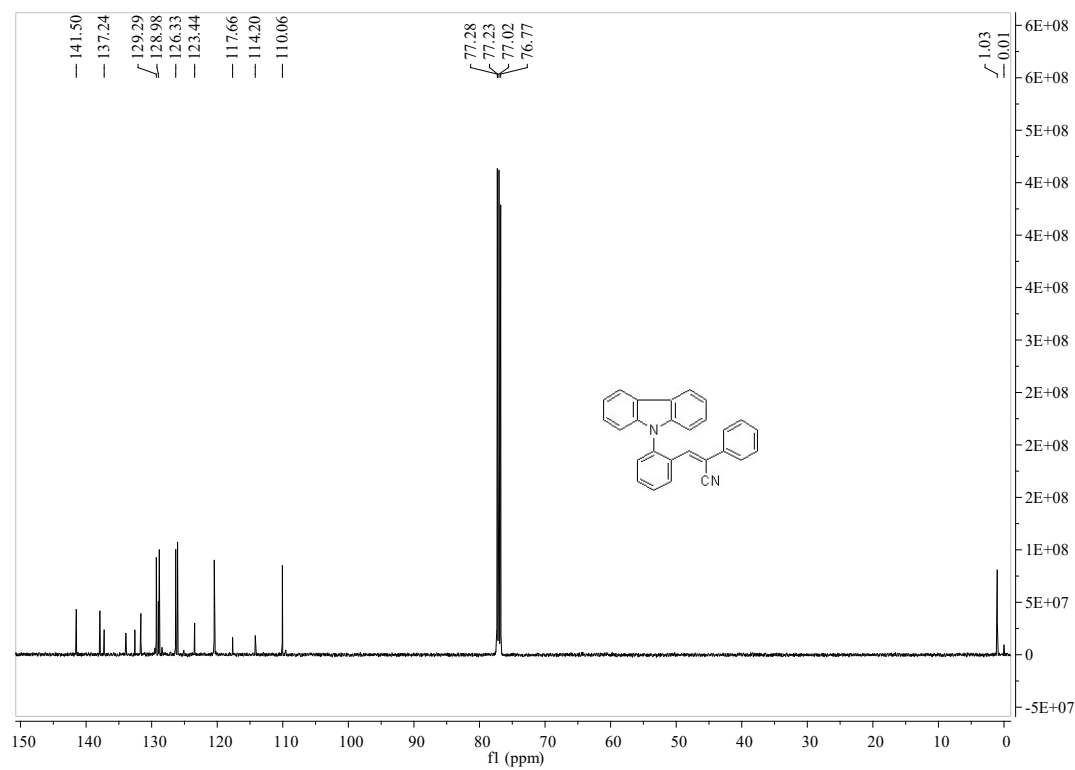

120

121 **Fig S4.**  $^{13}\text{C}$  NMR (125 MHz) spectrum of **Z-oCa** in  $\text{CDCl}_3$ .

122

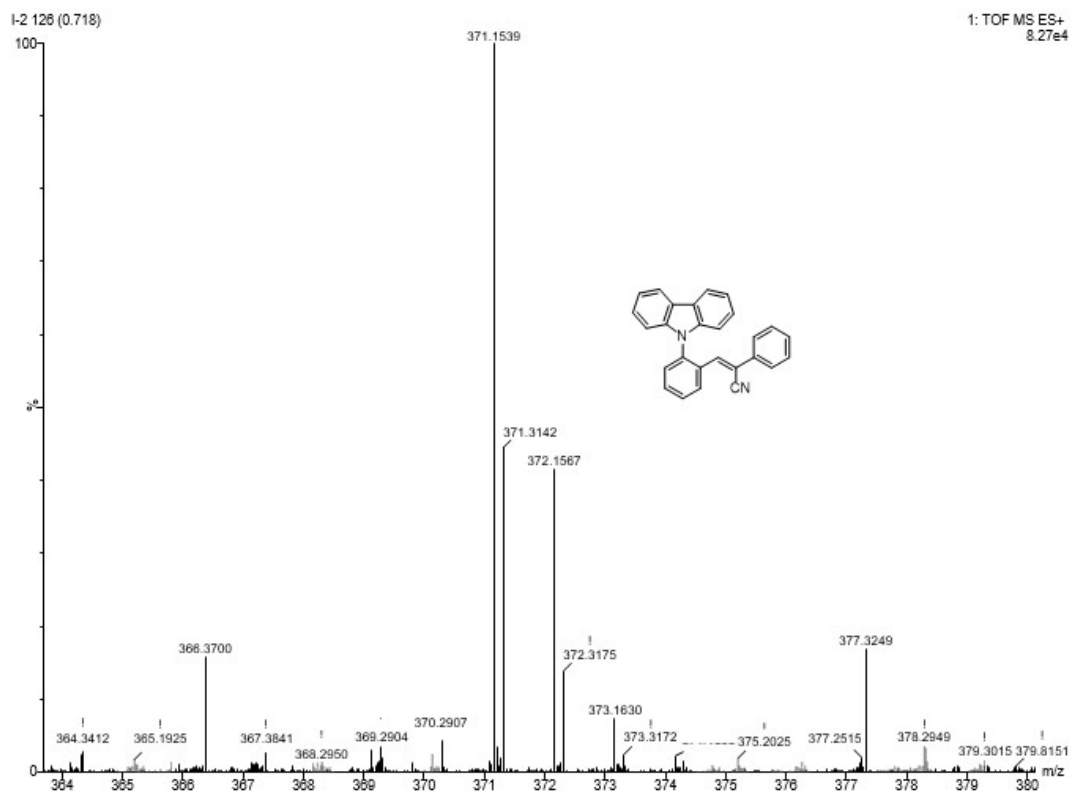

124 Fig S5. MALDI/TOF MS spectrum of compound Z-oCa.

125

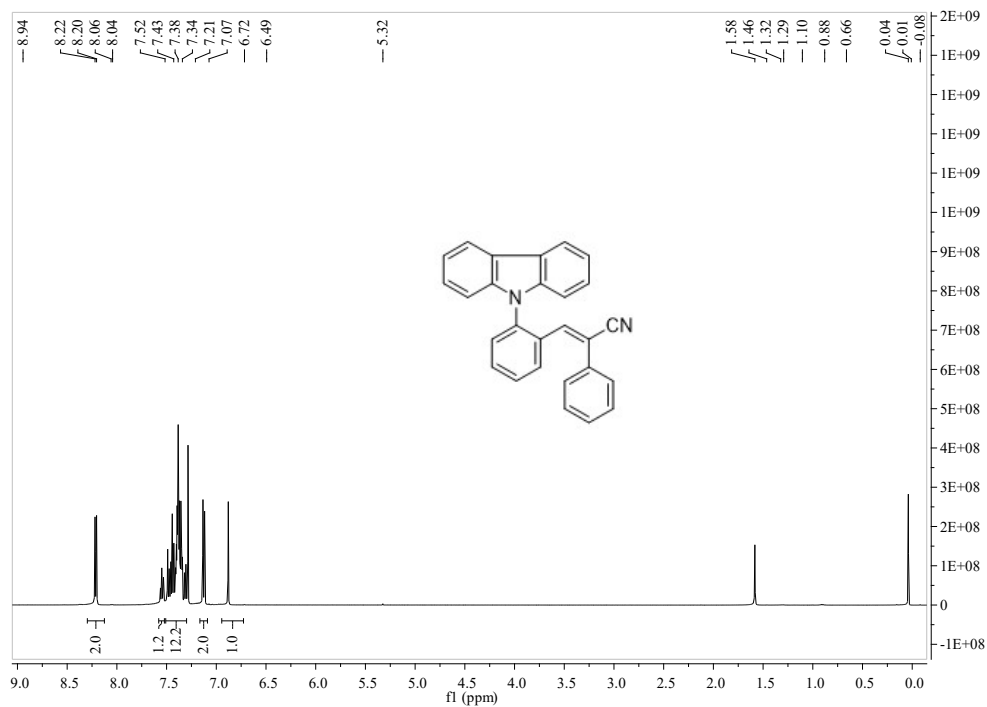

127 Fig S6.  $^1\text{H}$  NMR (500 MHz) spectrum of E-oCa in  $\text{CDCl}_3$ .

128

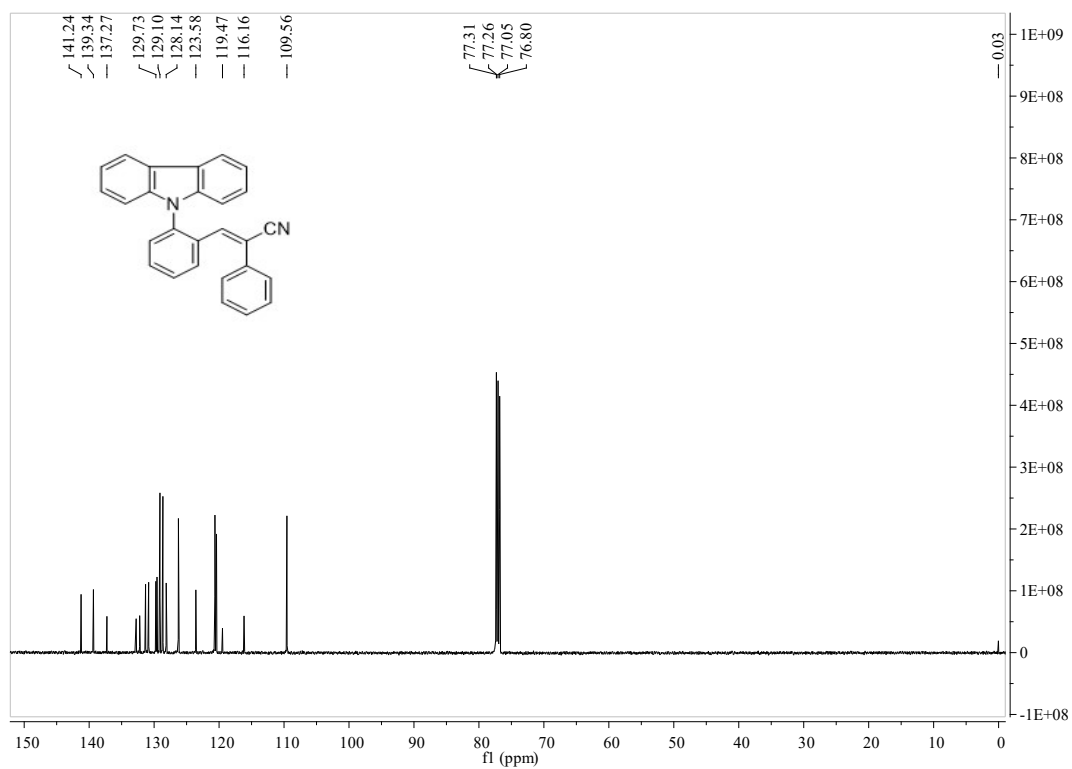

129

130 **Fig S7.** <sup>13</sup>C NMR (125 MHz) spectrum of **E-oCa** in CDCl<sub>3</sub>.

131

132

133



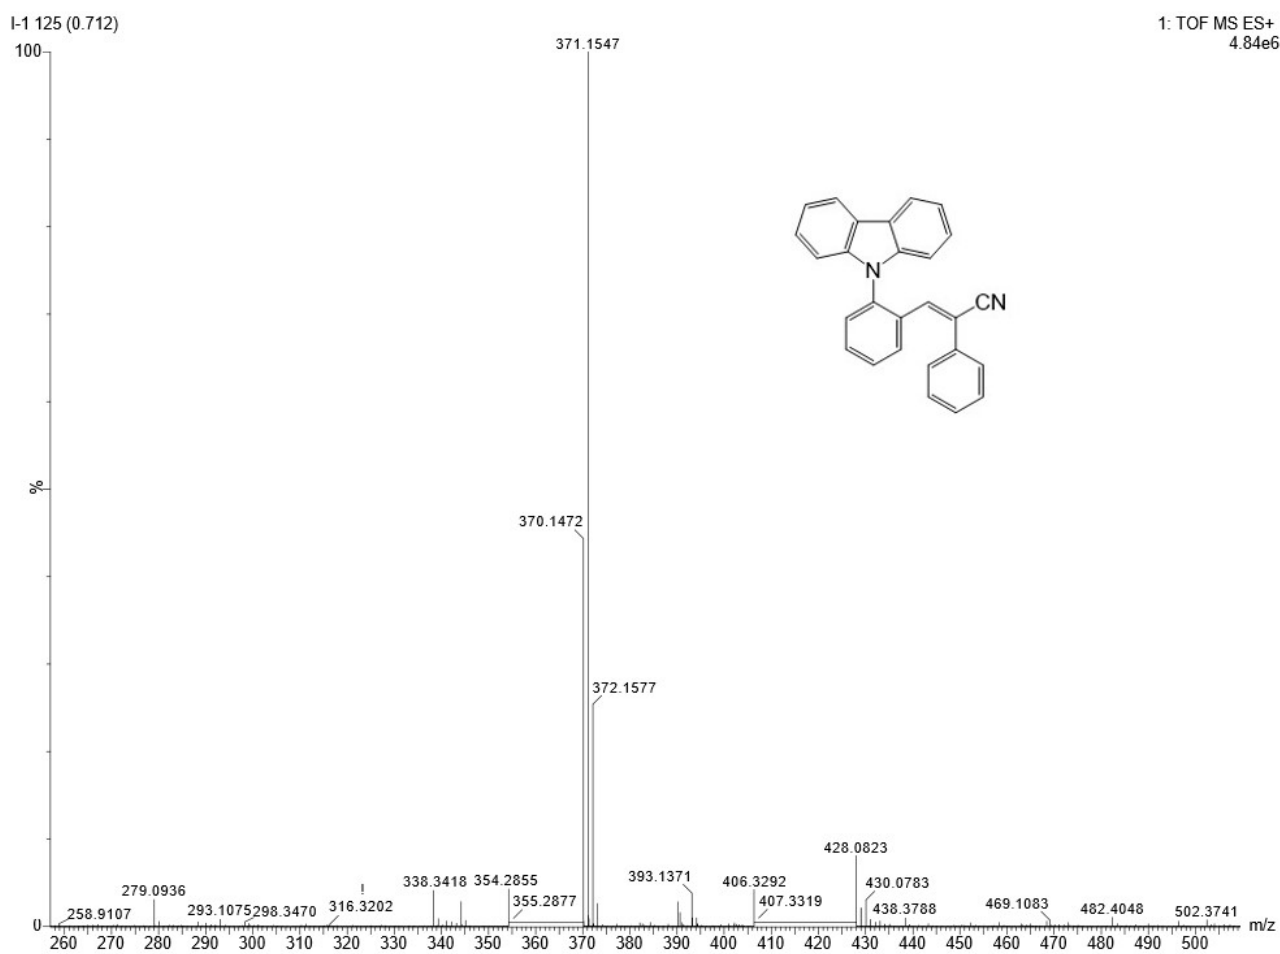

134

135 **Fig S8.** MALDI/TOF MS spectrum of compound **E-oCa**.

136

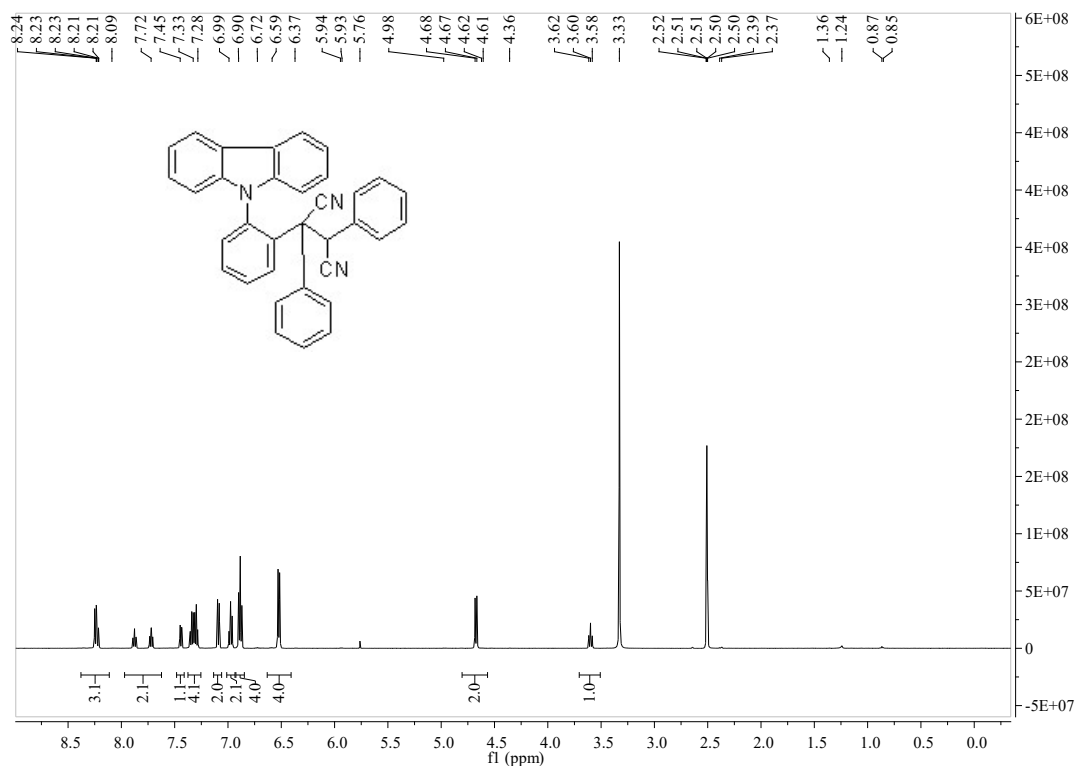

137

138 Fig S9.  $^1\text{H}$  NMR (500 MHz) spectrum of DCN in DMSO.

139

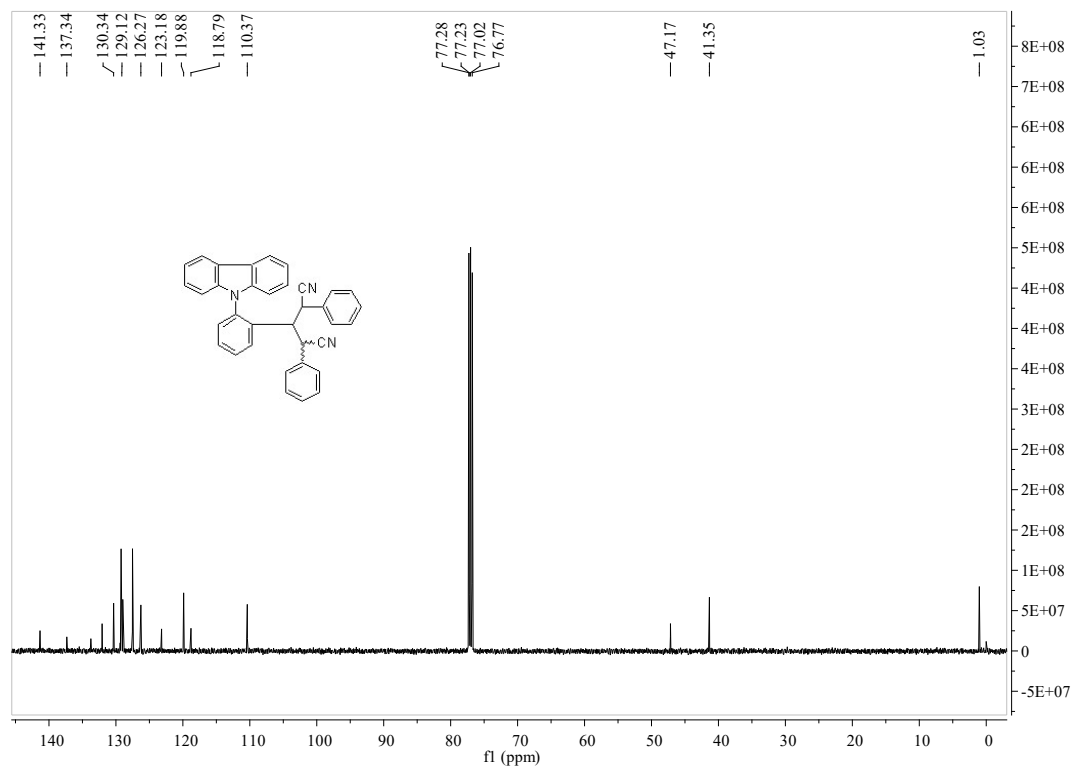

140

141 Fig S10.  $^{13}\text{C}$  NMR (125 MHz) spectrum of DCN in DMSO.

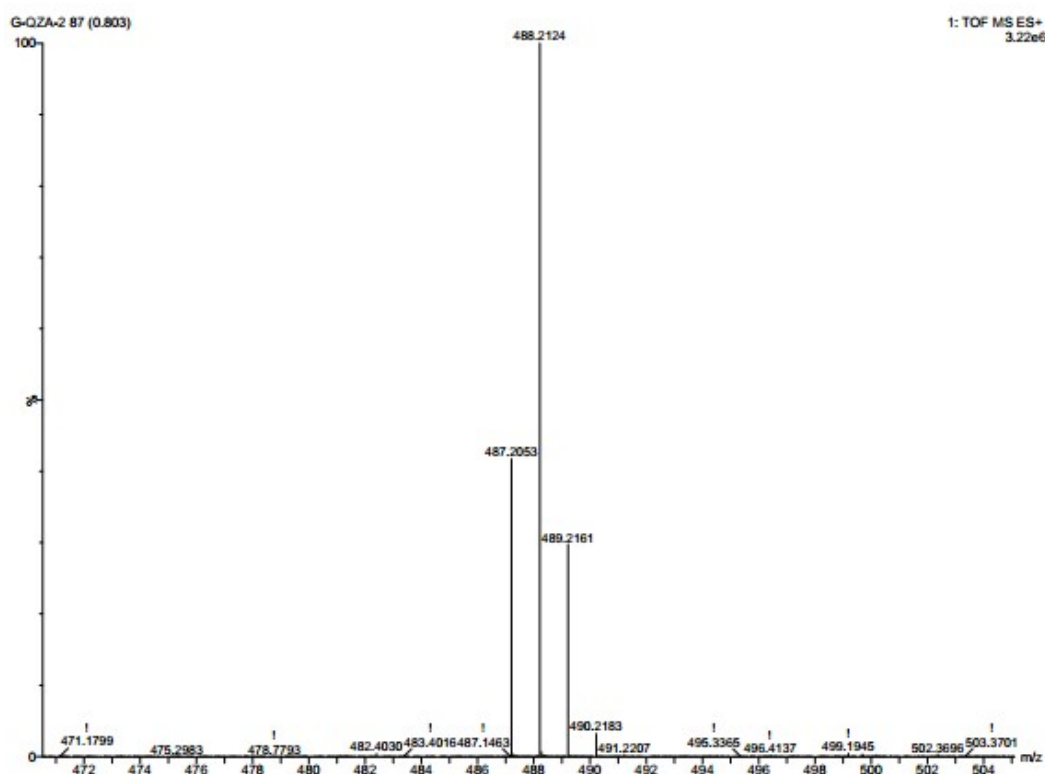

142

143 **Fig S11.** MALDI/TOF MS spectrum of compound **DCN**.

144

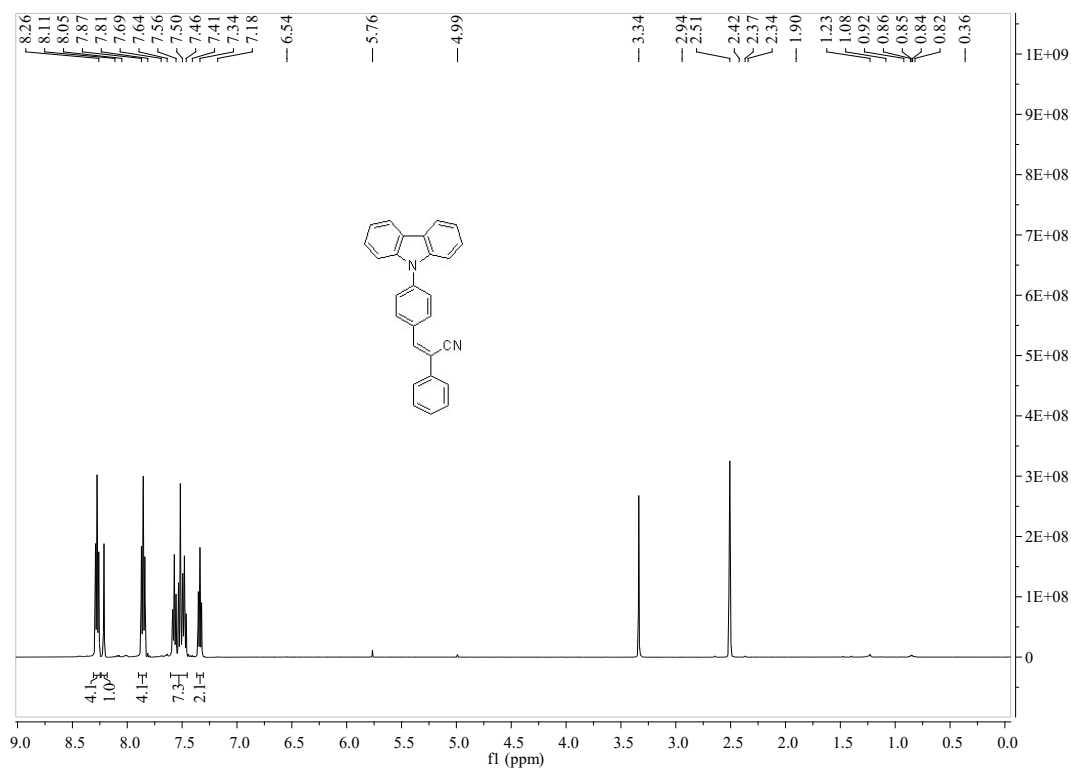

145

146 **Fig S12.**  $^1\text{H}$  NMR (500 MHz) spectrum of **Z-pCa** in DMSO.

147

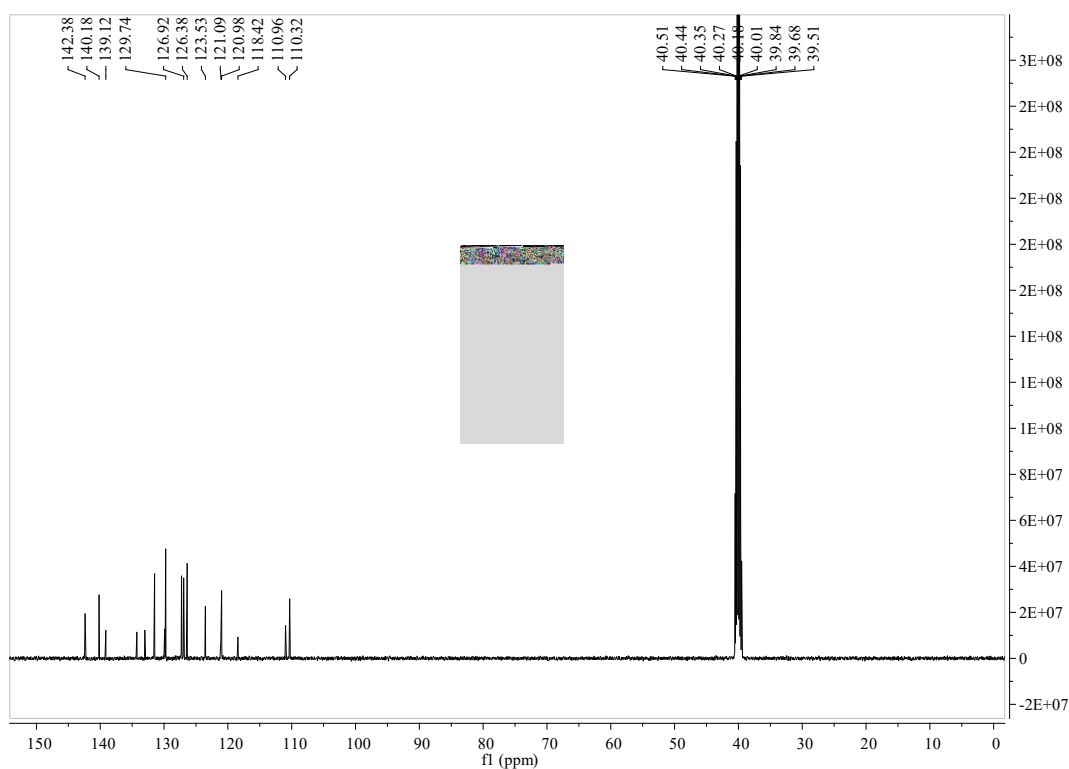

148

149 **Fig S13.**  $^{13}\text{C}$  NMR (125 MHz) spectrum of **Z-pCa** in DMSO.

150

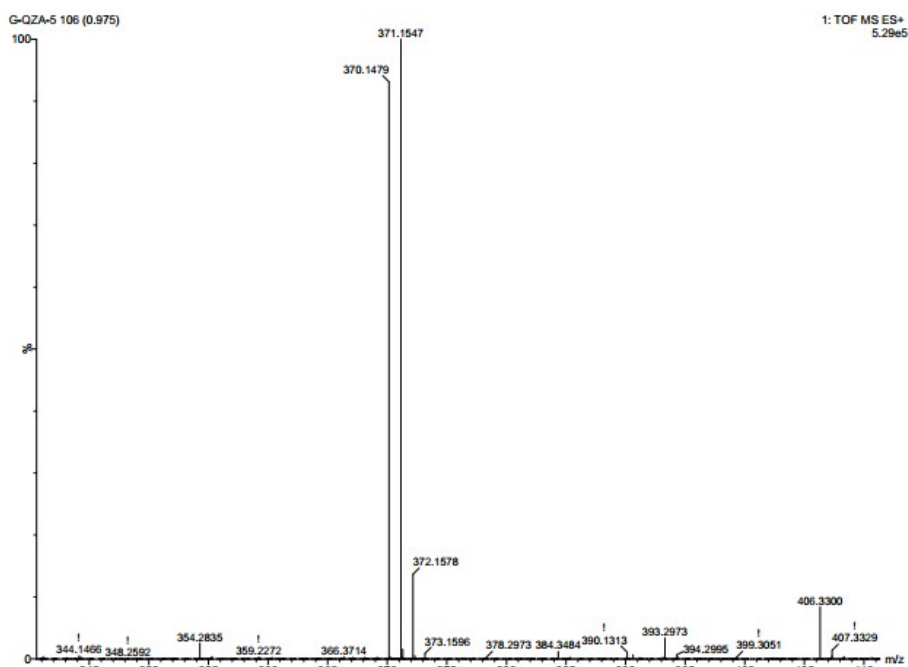

151

152 **Fig S14.** MALDI/TOF MS spectrum of compound **Z-pCa**.

153

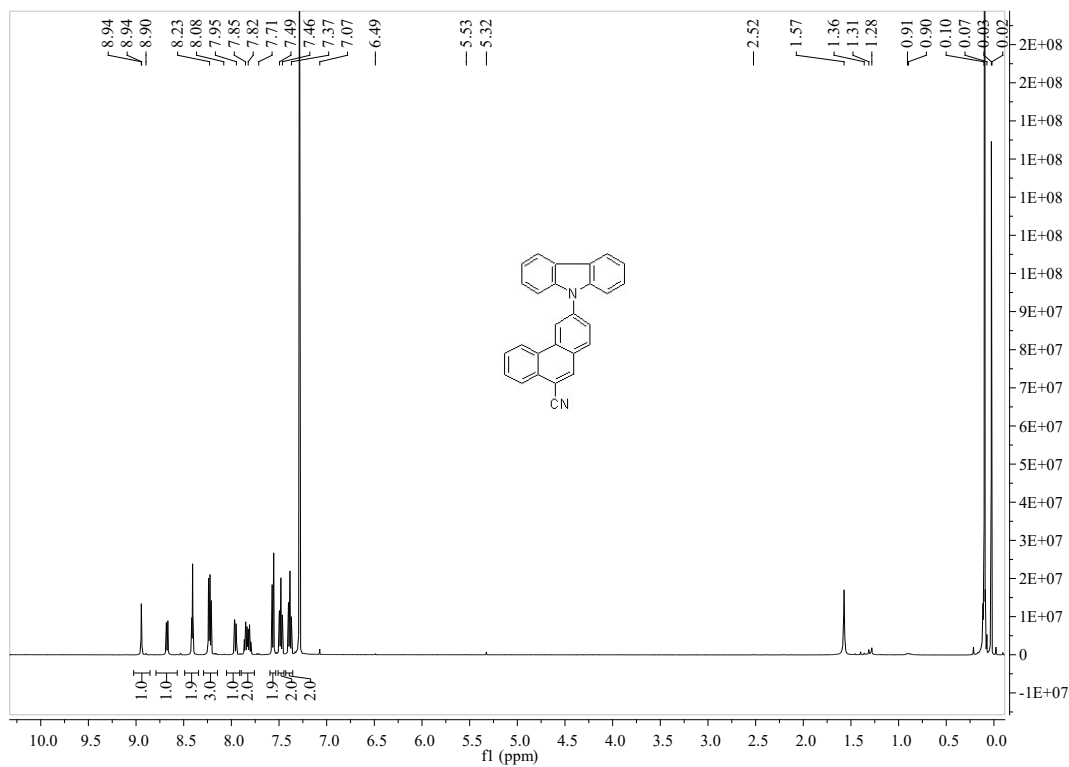

154

155 **Fig S15.**  $^1\text{H}$  NMR (500 MHz) spectrum of **C-Ca** in  $\text{CDCl}_3$ .

156

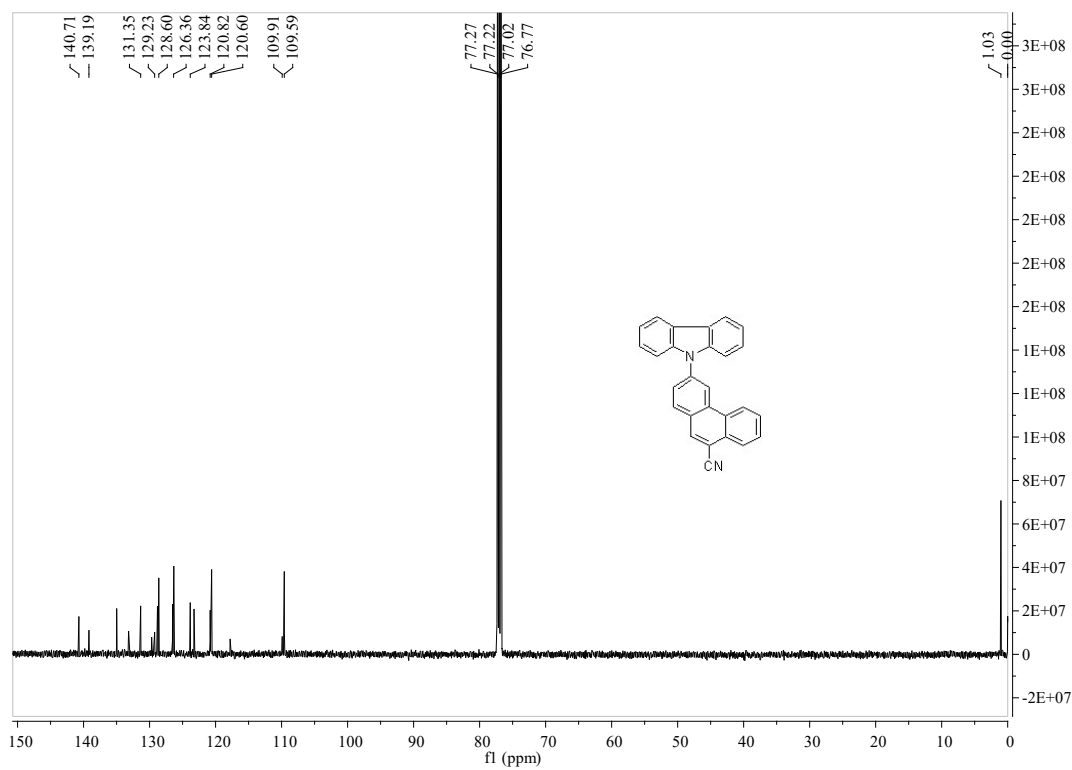

157

158 **Fig S16.**  $^{13}\text{C}$  NMR (125 MHz) spectrum of **C-Ca** in  $\text{CDCl}_3$ .

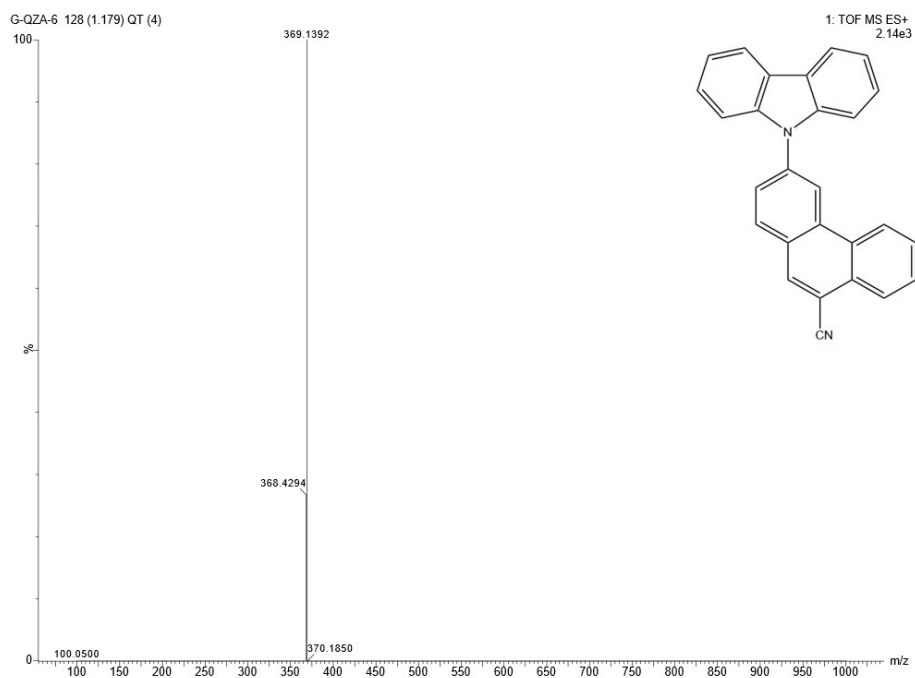

159

160 **Fig S17.** MALDI/TOF MS spectrum of compound C-Ca.

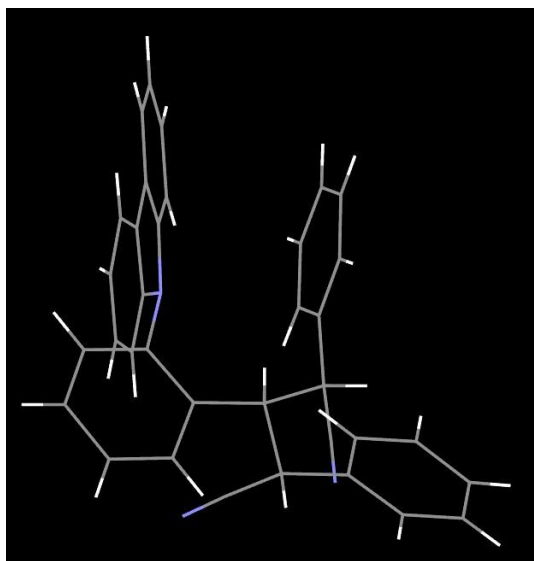

161

162 **Fig S18.** Single crystal structure of compound DCN.

163

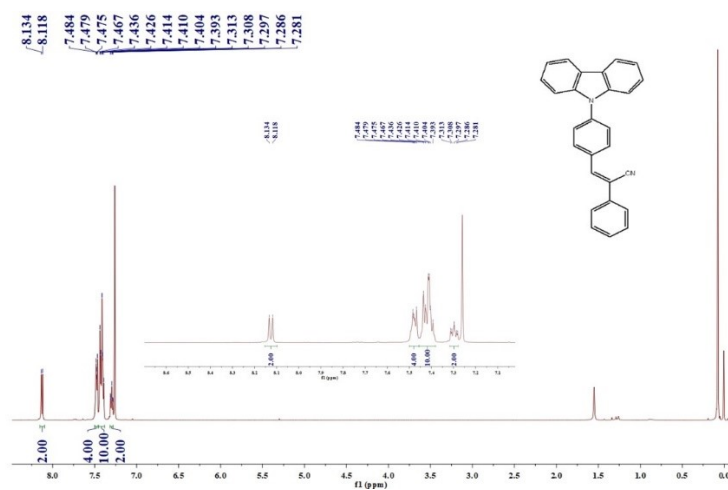

164

165

Fig S19. <sup>1</sup>H NMR (500 MHz) spectrum of **Z-pCa** and **E-pCa** in CDCl<sub>3</sub>.

166
